# Supplementary material
Source: MDPI journal article supplement (https://www.mdpi.com/2311-553X/8/4/44)
Supplement: s1 [file s1]

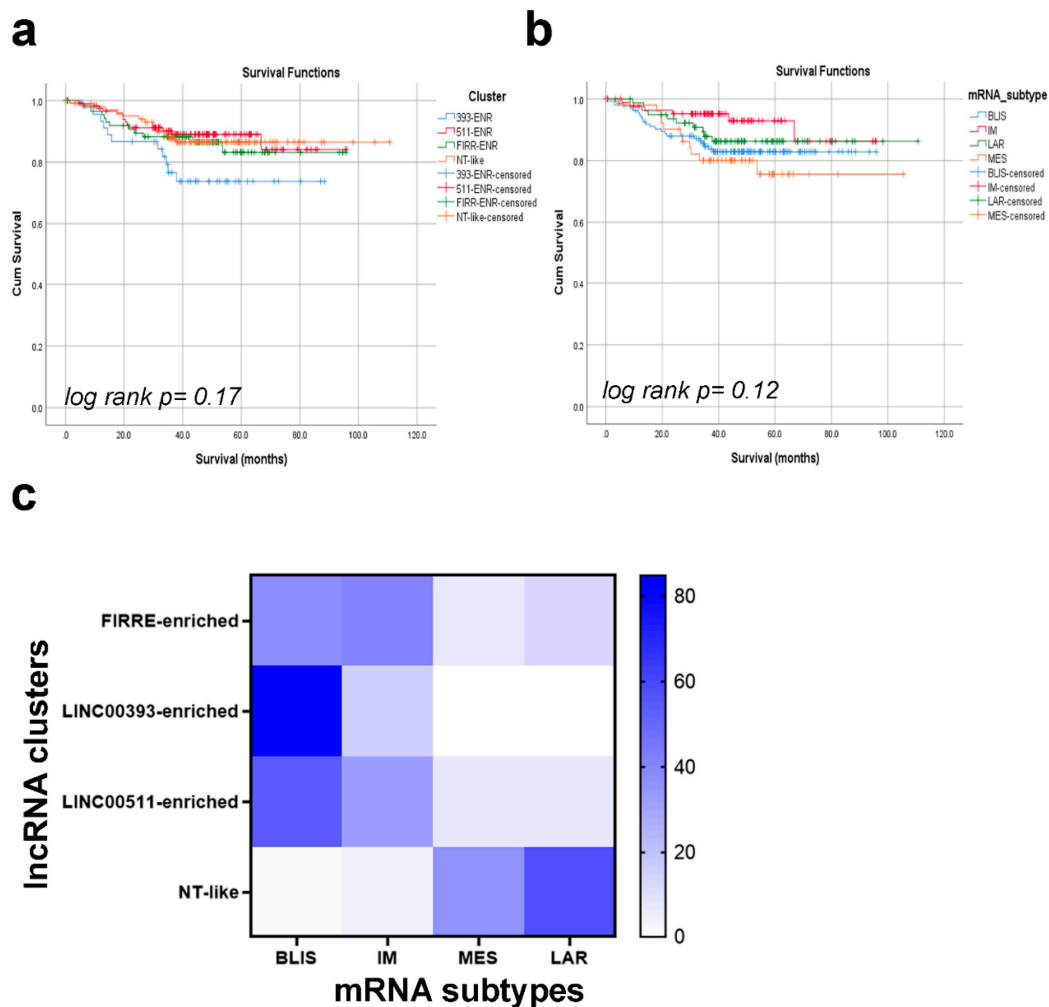

**Supplementary figure S5. Prognostic value of lncRNA-based classification.** (a) survival analysis of 360 TNBC patients as a function of their lncRNA-derived clusters. Log rank test was used for group comparisons. (b) survival analysis of same TNBC cohort as function of their mRNA-derived cluster (BLIS, IM, MES, and LAR). (c) Correlation matrix showing the correlation between the four lncRNA-based and mRNA-based TNBC clusters.
