# Supplementary material
Source: MDPI journal article supplement (https://www.mdpi.com/2311-553X/8/4/44)
Supplement: s1 [file s1]

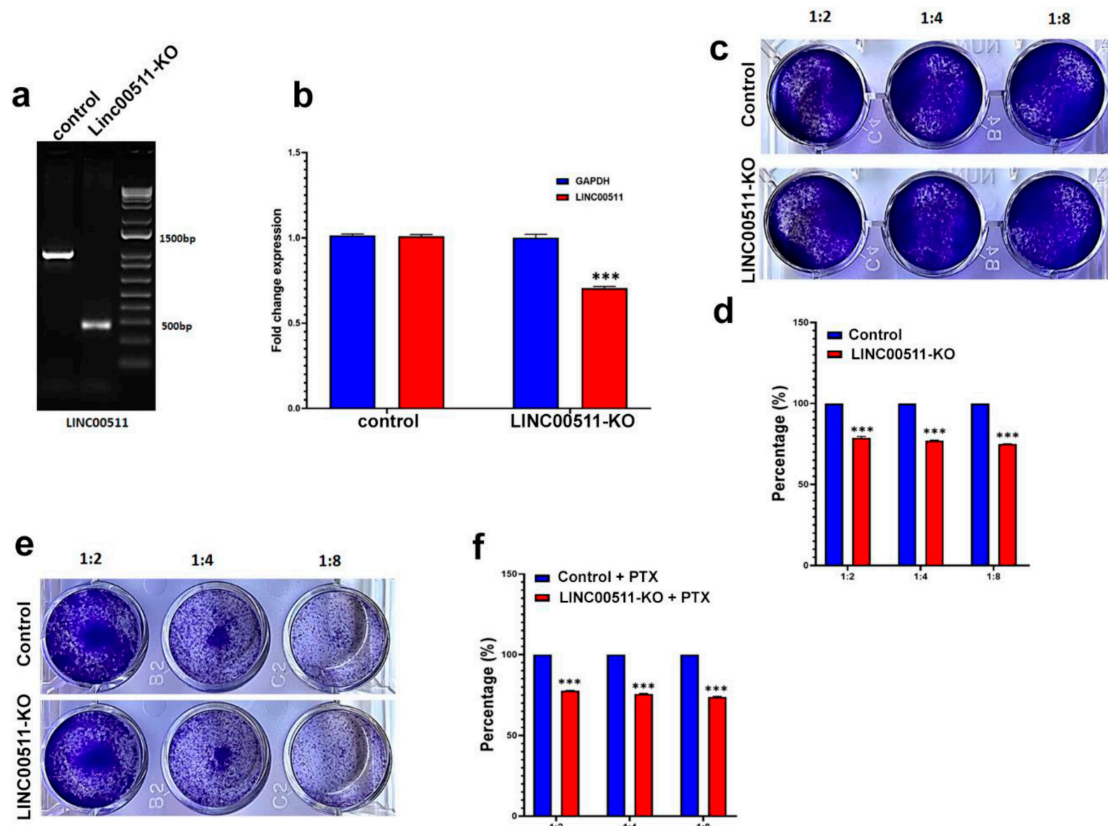

**Supplementary figure S6. Effect of CRISPR-Cas9 mediated LINC00511 promoter depletion on MDA-MB-157 colony formation and sensitivity to paclitaxel.** (a) Genomic deletion of ~ 700 bp from LINC00511 promoter region using CRISPR-Cas9 in MDA-MB-157 TNBC model. qRT-PCR for LINC00511 expression in parental and LINC00511-KO MDA-MB-157 cells. Data are presented as mean  $\pm$  SD, n = 3. \*\*\*p < 0.0005. Clonogenic assay for MDA-MB-157 parental and LINC00511-KO cells. (d) Quantification of CFU from panel c. (d) Clonogenic assay for MDA-MB-157 parental and LINC00511-KO cells in the presence of 10 nM Paclitaxel. (e) Quantification of CFU from panel d. \*\*\*p < 0.0005.
