# Supplementary material
Source: MDPI journal article supplement (https://www.mdpi.com/2311-553X/8/4/44)
Supplement: s1 [file s1]

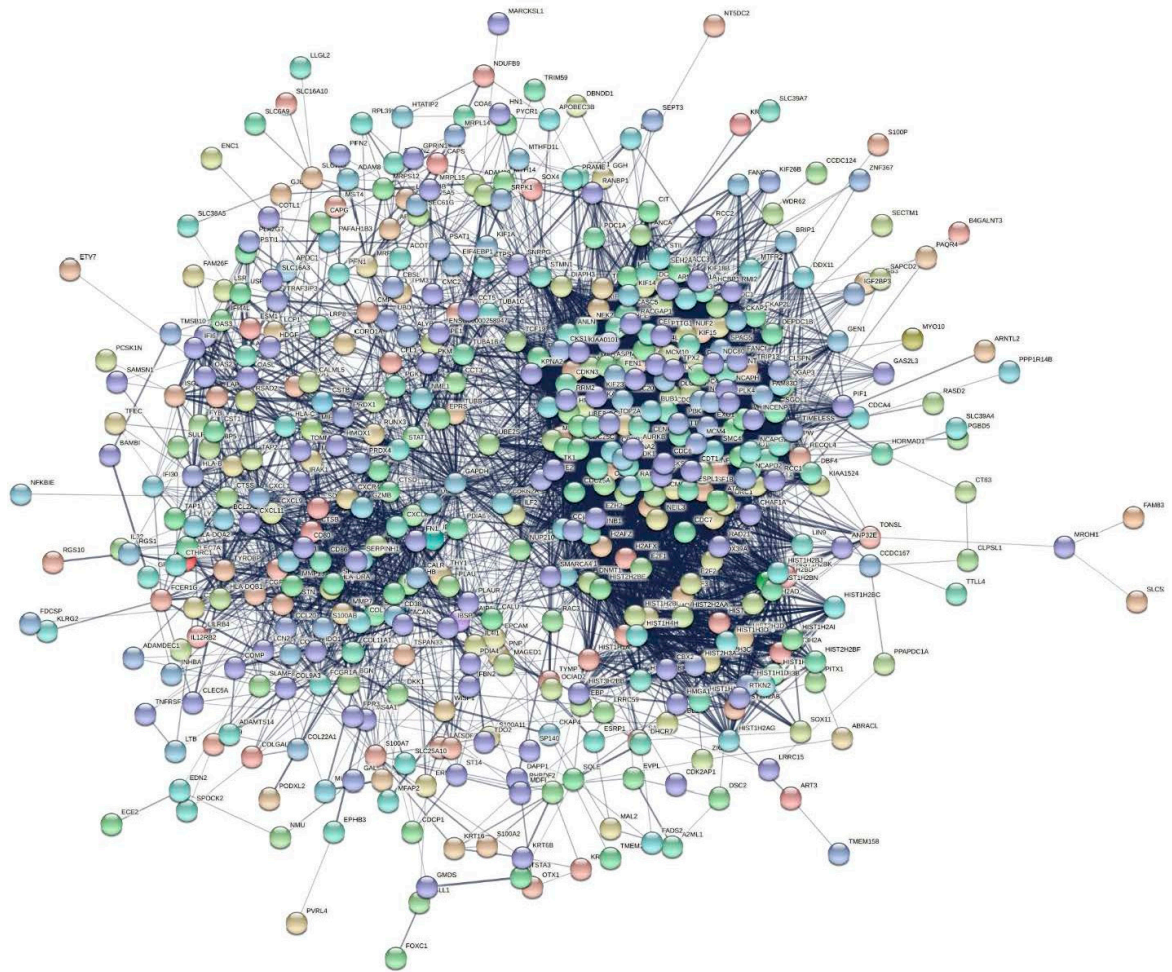

**Supplementary figure S2. PPI network for genes upregulated in LINC00511-Enr cluster.**

Network statistics: network exhibited 539 nodes, 11,067 edges, with an average node degree of 41.1 and avg. local clustering coefficient of 0.531 and PPI enrichment p-value of  $< 1.0e^{-16}$ .
